# Supplementary material
Source: PubMed Central journal article supplement (PMC521952)

# SAE2-P Peptide: DDVLIIVD

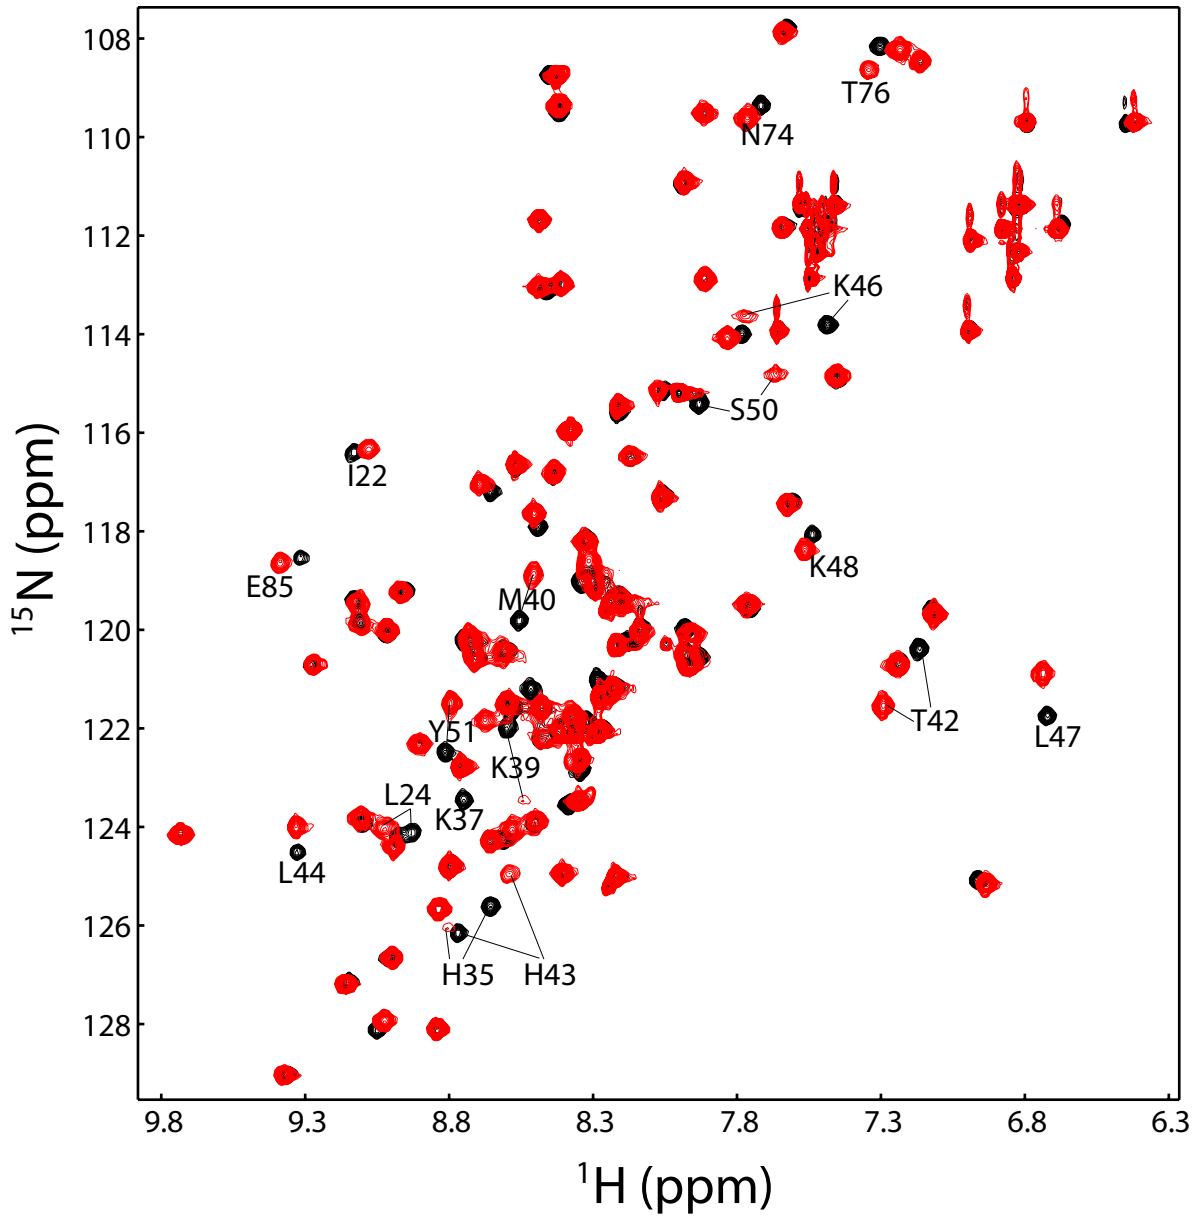

Supplement: pnas_101_40_14373__2.pdf [file pnas_101_40_14373__2.pdf]

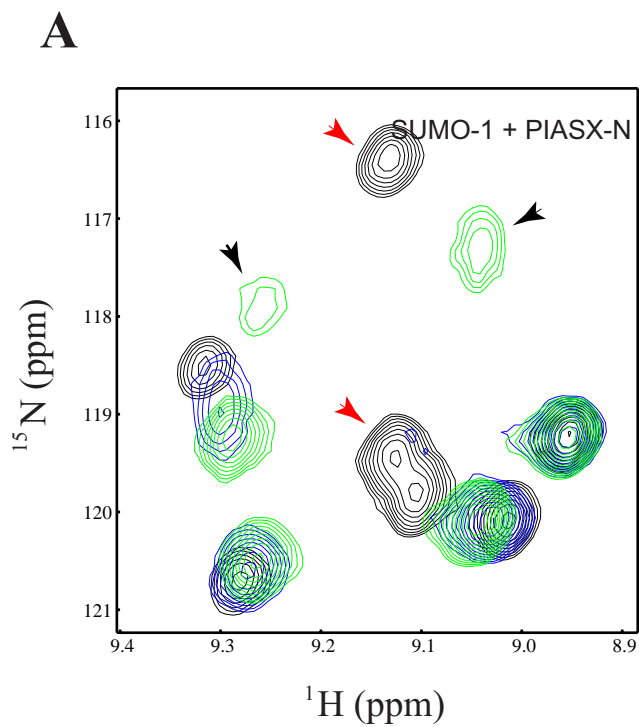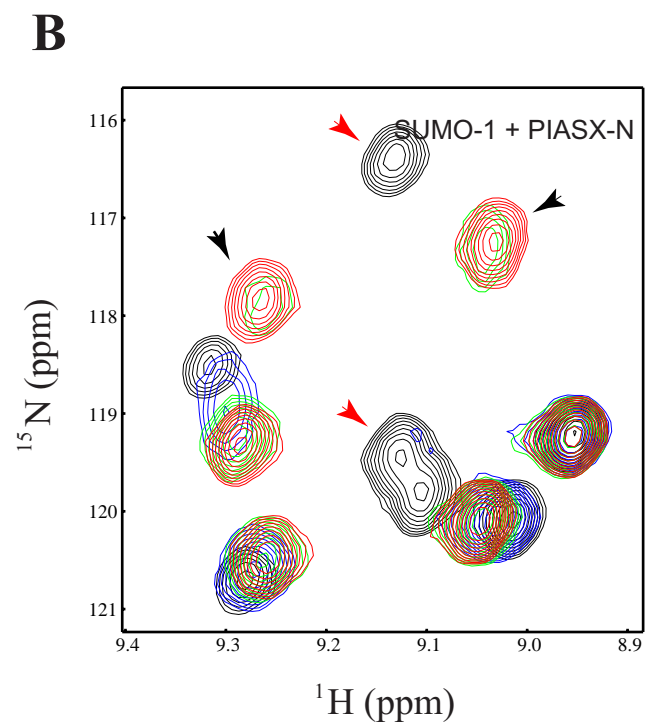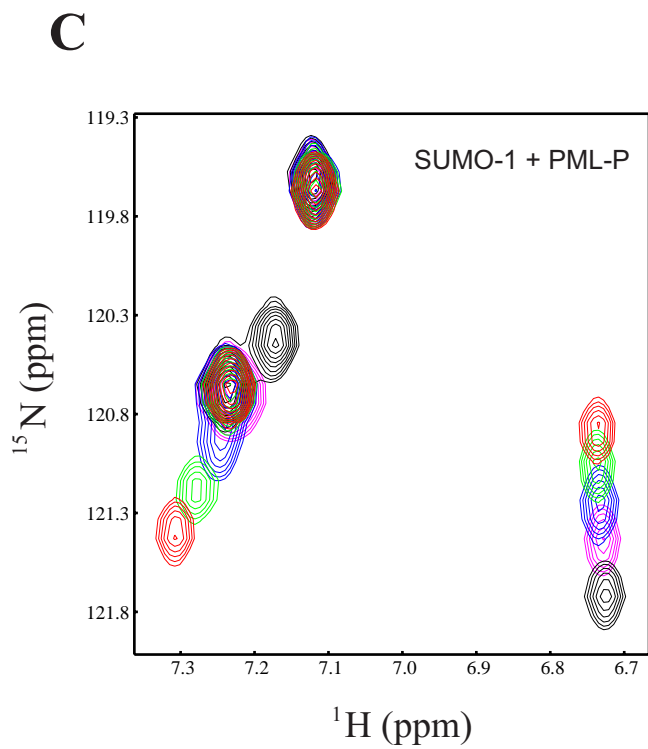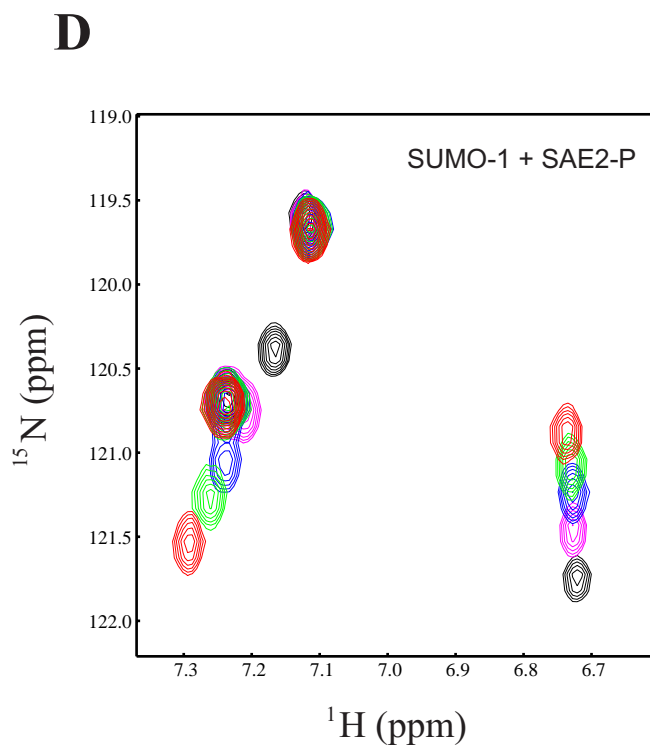

Supplement: pnas_101_40_14373__3.pdf [file pnas_101_40_14373__3.pdf]
